# Supplementary material
Source: Springer Nature journal article supplement (https://www.springermedizin.de/resource/supplementary/12881_2013_1234_MOESM2_ESM.pdf/9452198)

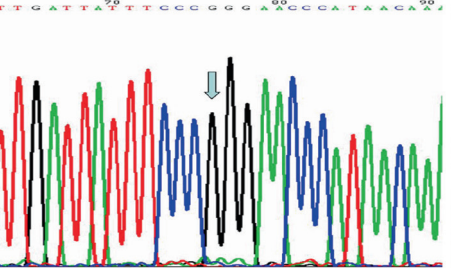

A

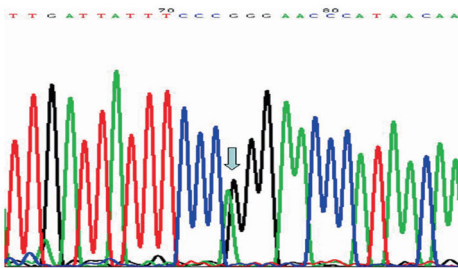

B

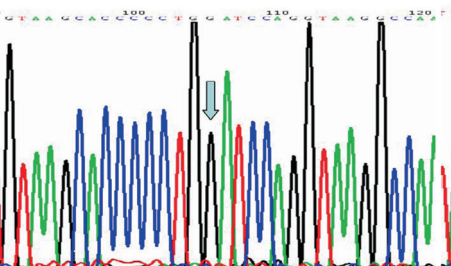

C

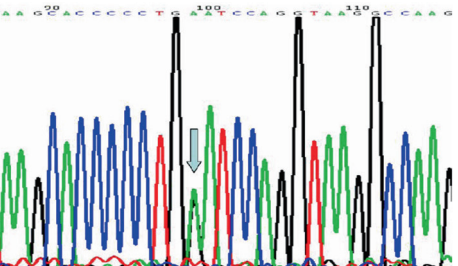

D

Supplement: MOESM2 [file 9452198]
